# Supplementary material for: Elemental Analysis and In Vitro Evaluation of Antibacterial and Antifungal Activities of Usnea barbata (L.) Weber ex F.H. Wigg from Călimani Mountains, Romania
Source: MDPI journal article supplement (doi:10.3390/plants11010032), 2021-12-23
Supplement: s1 [file s1]

**Table S1.** Specificity of ICP-MS elemental analysis, for two *U. barbata* (dUB) sample dilutions (d=10 and d=100), and (n=3) replicates; Spike Recovery % values for all 23 elements

| Sample Id | dUB d=10 | dUB d=10 spiked_1 | dUB d=10 spiked_2 | dUB d=10 spiked_3 | Average (µg/L) | Theoretical Concentration µg/L | Recovery % | dUB d=100 | dUB d=100 spiked_1 | dUB d=100 spiked_2 | dUB d=100 spiked_3 | Average (µg/L) | Recovery % |
|-----------|----------|-------------------|-------------------|-------------------|----------------|--------------------------------|------------|-----------|--------------------|--------------------|--------------------|----------------|------------|
| Ag (µg/L) | 0.007    | 0.970             | 0.964             | 0.948             | 0.961          | 1.000                          | 95.388     | 0.039     | -0.003             | -0.008             | -0.010             | -              | -          |
| Al (µg/L) | 100.124  | 109.101           | 107.952           | 107.166           | 108.073        | 10.000                         | 79.486     | 3.747     | 4.261              | 5.772              | 3.989              | -              | -          |
| As (µg/L) | 0.039    | 1.299             | 1.280             | 1.325             | 1.301          | 1.000                          | 126.231    | -0.006    | 0.045              | -0.032             | 0.032              | -              | -          |
| Ba (µg/L) | 2.968    | 4.153             | 4.087             | 4.044             | 4.095          | 1.000                          | 112.698    | 0.209     | 0.209              | 0.214              | 0.190              | -              | -          |
| Ca (µg/L) | 1576.439 | 1374.213          | 1489.114          | 1351.233          | 1404.853       | 50.000                         | -          | 128.688   | 197.629            | 151.669            | 216.013            | 188.437        | 119.496    |
| Cd (µg/L) | 0.126    | 1.336             | 1.287             | 1.179             | 1.268          | 1.000                          | 114.143    | 0.021     | 0.033              | 0.033              | 0.030              | -              | -          |
| Co (µg/L) | 0.054    | 1.546             | 1.576             | 1.549             | 1.557          | 1.000                          | 149.392    | -0.010    | -0.010             | -0.008             | -0.005             | -              | -          |
| Cr (µg/L) | 0.837    | 1.446             | 1.413             | 1.389             | 1.416          | 1.000                          | 141.600    | -0.302    | -0.363             | -0.346             | -0.366             | -              | -          |
| Cu (µg/L) | 1.268    | 2.518             | 2.571             | 2.576             | 2.555          | 1.000                          | 128.659    | -0.119    | -0.083             | -0.074             | -0.085             | -              | -          |
| Fe (µg/L) | 58.515   | 96.074            | 95.073            | 98.517            | 96.555         | 50.000                         | 76.080     | -12.715   | 26.726             | 26.755             | 26.637             | -              | -          |
| Li (µg/L) | 0.014    | 0.888             | 0.847             | 0.971             | 0.902          | 1.000                          | 88.848     | -0.005    | -0.014             | -0.014             | -0.018             | -              | -          |

**Table S1.** Specificity of ICP-MS elemental analysis, for two *U. barbata* (dUB) sample dilutions (d=10 and d=100), and (n=3) replicates; Spike Recovery % values for all 23 elements

| Sample Id | dUB d=10 | dUB d=10 spiked_1 | dUB d=10 spiked_2 | dUB d=10 spiked_3 | Average (µg/L) | Theoretical Concentration µg/L | Recovery % | dUB d=100 | dUB d=100 spiked_1 | dUB d=100 spiked_2 | dUB d=100 spiked_3 | Average µg/L | Recovery % |
|-----------|----------|-------------------|-------------------|-------------------|----------------|--------------------------------|------------|-----------|--------------------|--------------------|--------------------|--------------|------------|
| Mg (µg/L) | 184.425  | 214.310           | 213.644           | 212.645           | 213.533        | 50.000                         | -          | 14.094    | 48.214             | 49.692             | 48.841             | 49.266       | 70.345     |
| Mn (µg/L) | 109.459  | 143.390           | 144.431           | 142.186           | 143.336        | 50.000                         | -          | 9.928     | 46.451             | 45.786             | 46.435             | 46.224       | 72.592     |
| Ni (µg/L) | 0.607    | 1.759             | 1.744             | 1.665             | 1.723          | 1.000                          | 111.593    | -0.359    | -0.060             | -0.070             | -0.083             | -            |            |
| Pb (µg/L) | 1.351    | 2.150             | 2.129             | 2.085             | 2.122          | 1.000                          | 77.052     | -0.181    | -0.087             | -0.087             | -0.090             | -            |            |
| Tl (µg/L) | -0.003   | 0.881             | 0.869             | 0.855             | 0.868          | 1.000                          | 87.100     | 0.061     | 0.016              | 0.017              | 0.016              | -            |            |
| V (µg/L)  | 0.176    | 0.982             | 0.970             | 0.990             | 0.981          | 1.000                          | 80.444     | 0.003     | 0.006              | 0.006              | 0.004              | -            |            |
| Zn (µg/L) | 25.235   | 85.796            | 85.203            | 82.649            | 84.550         | 50.000                         | 118.629    | -1.034    | 62.236             | 61.223             | 61.767             | -            |            |
| Hg (µg/L) | 0.677    | 2.010             | 1.831             | 1.942             | 1.928          | 1.000                          | 125.061    | -0.068    | -0.013             | -0.017             | -0.030             | -            |            |
| Mo (µg/L) | 0.027    | 0.854             | 0.879             | 0.847             | 0.860          | 1.000                          | 83.345     | -0.005    | -0.005             | -0.010             | -0.016             | -            |            |
| Pd (µg/L) | 0.177    | 1.036             | 1.049             | 1.011             | 1.032          | 1.000                          | 85.469     | -0.015    | -0.008             | -0.012             | -0.011             | -            |            |
| Pt (µg/L) | 0.000    | 1.098             | 1.084             | 1.068             | 1.083          | 1.000                          | 108.305    | -0.001    | -0.001             | -0.001             | 0.000              | -            |            |
| Sb (µg/L) | 0.045    | 1.121             | 1.066             | 1.157             | 1.115          | 1.000                          | 106.999    | -0.018    | 0.038              | 0.066              | 0.061              | -            |            |
