# Supplementary material for: Elemental Analysis and In Vitro Evaluation of Antibacterial and Antifungal Activities of Usnea barbata (L.) Weber ex F.H. Wigg from Călimani Mountains, Romania
Source: MDPI journal article supplement (doi:10.3390/plants11010032), 2021-12-23
Supplement: s1 [file s1]

**Table S2.** Determination of the detection limit value (LOD) value for each element in ICP-MS analysis of *Usnea barbata* dried lichen

| Analyte     | Standard 1_1 | Standard 1_2 | Standard 1_3 | Standard 1_4 | Standard 1_5 | Standard 1_6 | Standard 1_7 | Standard 1_8 | Standard 1_9 | Standard 1_10 | STD DEV | SLOPE    | LOD<br>µg/L |
|-------------|--------------|--------------|--------------|--------------|--------------|--------------|--------------|--------------|--------------|---------------|---------|----------|-------------|
| Ag<br>(cps) | 3342.800     | 3210.700     | 3149.000     | 3219.100     | 3213.700     | 3260.400     | 3247.100     | 3122.000     | 3190.100     | 3189.400      | 58.085  | 3295.000 | 0.058       |
| Al<br>(cps) | 92.300       | 103.700      | 98.700       | 100.700      | 106.700      | 116.300      | 110.300      | 123.300      | 121.700      | 111.300       | 9.544   | 11.000   | 2.863       |
| As<br>(cps) | 47.000       | 46.700       | 41.000       | 51.700       | 58.000       | 41.300       | 51.000       | 56.700       | 49.000       | 50.000        | 5.335   | 51.000   | 0.345       |
| Ba<br>(cps) | 1715.900     | 1703.600     | 1714.600     | 1759.300     | 1701.000     | 1681.300     | 1637.900     | 1684.300     | 1636.900     | 1706.900      | 34.840  | 1721.000 | 0.067       |
| Ca<br>(cps) | 5.000        | 2.300        | 1.000        | 3.700        | 6.700        | 4.000        | 3.000        | 5.000        | 4.000        | 4.300         | 1.492   | 1.000    | 4.924       |
| Cd<br>(cps) | 179.300      | 196.300      | 178.300      | 199.700      | 196.000      | 193.00       | 187.700      | 206.300      | 201.300      | 196.300       | 8.669   | 195.000  | 0.147       |
| Co<br>(cps) | 1571.800     | 1584.400     | 1562.800     | 1629.100     | 1592.400     | 1598.400     | 1568.400     | 1619.800     | 1560.800     | 1524.100      | 29.126  | 1608.000 | 0.060       |
| Cr<br>(cps) | 540.000      | 503.400      | 546.700      | 566.400      | 535.000      | 521.400      | 527.400      | 542.700      | 505.400      | 511.700       | 19.022  | 698.000  | 0.090       |
| Cu<br>(cps) | 1387.100     | 1355.800     | 1369.100     | 1406.800     | 1389.400     | 1347.100     | 1349.100     | 1394.800     | 1377.800     | 1322.400      | 24.755  | 1441.000 | 0.057       |
| Fe<br>(cps) | 398.011      | 372.677      | 409.679      | 372.677      | 395.678      | 376.677      | 385.344      | 393.345      | 385.011      | 384.678       | 11.308  | 11.000   | 3.392       |
| Li<br>(cps) | 65.333       | 64.000       | 72.667       | 76.000       | 67.000       | 65.667       | 64.000       | 66.667       | 75.000       | 67.667        | 4.250   | 71.000   | 0.198       |

**Table S2.** Determination of the detection limit value (LOD) value for each element in ICP-MS analysis of *Usnea barbata* dried lichen

|                     |          |          |          |          |          |          |          |          |          |          |         |          |       |
|---------------------|----------|----------|----------|----------|----------|----------|----------|----------|----------|----------|---------|----------|-------|
| <b>Mg<br/>(cps)</b> | 2103.510 | 2020.830 | 2057.170 | 2054.500 | 2104.170 | 2009.490 | 2015.830 | 2037.500 | 2039.830 | 2042.500 | 31.343  | 41.000   | 2.523 |
| <b>Mn<br/>(cps)</b> | 9224.670 | 8887.450 | 9164.960 | 9228.340 | 9134.940 | 9179.970 | 9045.220 | 9135.610 | 9062.230 | 8981.180 | 104.231 | 180.000  | 1.911 |
| <b>Ni<br/>(cps)</b> | 417.346  | 410.345  | 426.679  | 422.346  | 416.012  | 409.345  | 448.014  | 443.680  | 403.678  | 425.679  | 13.677  | 469.000  | 0.096 |
| <b>Pb<br/>(cps)</b> | 5970.750 | 5854.020 | 5723.620 | 5918.390 | 5984.090 | 6013.111 | 5703.270 | 5877.700 | 5839.010 | 5754.300 | 104.641 | 6477.000 | 0.053 |
| <b>Tl<br/>(cps)</b> | 9691.380 | 9549.950 | 9587.310 | 9704.050 | 9632.000 | 9666.700 | 9451.220 | 9586.310 | 9554.620 | 9624.670 | 72.164  | 9633.000 | 0.025 |
| <b>V<br/>(cps)</b>  | 473.675  | 475.342  | 493.342  | 482.675  | 500.009  | 474.342  | 508.343  | 451.341  | 493.342  | 480.342  | 15.410  | 492.000  | 0.103 |
| <b>Zn<br/>(cps)</b> | 3401.470 | 3273.770 | 3309.110 | 3282.770 | 3359.120 | 3317.780 | 3319.440 | 3333.450 | 3374.790 | 3332.110 | 37.506  | 62.000   | 1.996 |
| <b>Hg<br/>(cps)</b> | 85.667   | 84.667   | 84.000   | 74.334   | 80.000   | 75.334   | 71.000   | 77.667   | 75.667   | 84.334   | 4.923   | 82.000   | 0.198 |
| <b>Mo<br/>(cps)</b> | 1350.590 | 1333.850 | 1309.660 | 1375.560 | 1281.290 | 1305.990 | 1279.550 | 1267.250 | 1264.100 | 1248.250 | 39.149  | 1332.000 | 0.097 |
| <b>Pd<br/>(cps)</b> | 1954.96  | 1919.63  | 1848.710 | 1866.300 | 1884.660 | 1864.280 | 1880.810 | 1837.640 | 1835.130 | 1865.620 | 35.301  | 1819.000 | 0.064 |
| <b>Pt<br/>(cps)</b> | 3682.81  | 3614.79  | 3676.470 | 3685.140 | 3697.150 | 3708.150 | 3691.48  | 3626.800 | 3668.140 | 3633.46  | 30.525  | 3731.000 | 0.027 |
| <b>Sb<br/>(cps)</b> | 277.336  | 268.336  | 286.003  | 301.003  | 278.003  | 290.670  | 296.337  | 262.336  | 274.003  | 281.003  | 11.539  | 275.000  | 0.138 |
