# Supplementary material for: Elemental Analysis and In Vitro Evaluation of Antibacterial and Antifungal Activities of Usnea barbata (L.) Weber ex F.H. Wigg from Călimani Mountains, Romania
Source: MDPI journal article supplement (doi:10.3390/plants11010032), 2021-12-23
Supplement: s1 [file s1]

For calibration standard solutions (Cal.Std.) preparation, the suitable standard solutions are registered in Table S3.

**Table S3.** ICP-MS Standard solutions

| Solution                                                       | Concentration | Manufacturer |
|----------------------------------------------------------------|---------------|--------------|
| Arsenic Standard Solution                                      | 1000 µg/mL    | Perkin Elmer |
| Lead Standard Solution                                         | 1000 µg/mL    | Perkin Elmer |
| Cadmium Standard Solution                                      | 1000 µg/mL    | Perkin Elmer |
| Mercury Standard Solution                                      | 10 µg/mL      | Perkin Elmer |
| Aluminium Standard Solution                                    | 1000 µg/mL    | Perkin Elmer |
| Calcium Standard Solution                                      | 1000 µg/mL    | Perkin Elmer |
| Iron Standard Solution                                         | 1000 µg/mL    | Perkin Elmer |
| Magnesium Standard Solution                                    | 1000 µg/mL    | Perkin Elmer |
| Manganese Standard Solution                                    | 1000 µg/mL    | Perkin Elmer |
| Zinc Standard Solution                                         | 1000 µg/mL    | Perkin Elmer |
| Silver Standard Solution                                       | 1000 µg/mL    | Perkin Elmer |
| Barium Standard Solution                                       | 1000 µg/mL    | Perkin Elmer |
| Cobalt Standard Solution                                       | 1000 µg/mL    | Perkin Elmer |
| Chromium Standard Solution                                     | 1000 µg/mL    | Perkin Elmer |
| Cooper Standard Solution                                       | 1000 µg/mL    | Perkin Elmer |
| Lithium Standard Solution                                      | 1000 µg/mL    | Perkin Elmer |
| Nickel Standard Solution                                       | 1000 µg/mL    | Perkin Elmer |
| Thallium Standard Solution                                     | 1000 µg/mL    | Perkin Elmer |
| Vanadium Standard Solution                                     | 1000 µg/mL    | Perkin Elmer |
| Molybdenum Standard Solution                                   | 1000 µg/mL    | Perkin Elmer |
| Palladium Standard Solution                                    | 1000 µg/mL    | Perkin Elmer |
| Platinum Standard Solution                                     | 1000 µg/mL    | Perkin Elmer |
| Antimony Standard Solution                                     | 1000 µg/mL    | Perkin Elmer |
| NexION Setup Solution (Be, Ce, Fe, In, Li, Mg, Pb, U)          | 1 µg/L        | Perkin Elmer |
| NexION KED Mode Setup Solution (Be, Ce, Fe, In, Li, Mg, Pb, U) | 1 µg/L        | Perkin Elmer |

Four intermediary stock solutions (Sol. I – Sol. IV) were prepared as follows:

Sol. I (As, Pb, Cd, Hg) 1 mg/L: In a 20 mL volumetric flask were added: 0.2 mL 65% HNO<sub>3</sub>, 0.02 mL solution As 1000 mg / L, 0.02 mL solution Pb 1000 mg / L, 0.02 mL solution Cd 1000 mg / L and 2 mL solution Hg 10 mg / L; then, the obtained solution was brought to the mark with ultrapure water.

Sol. II (Ca, Fe, Mg, Mn, Zn) 10 mg/L: In a 50 mL volumetric flask were added: 0.5 mL 65% HNO<sub>3</sub>, 0.5 mL solution Ca 1000 mg / L, 0.5 mL solution Fe 1000 mg / L, 0.5 mL solution Mg 1000 mg / L, 0.5 mL solution Mn 1000 mg / L and 0.5 mL solution Zn 1000 mg / L; then, the flask content was brought to the mark with ultrapure water.

Sol. III (Al) 10 mg/L: In a 50 mL volumetric flask were added 0.5 mL 65% HNO<sub>3</sub>, 0.5 mL solution Al 1000 mg/L, and ultrapure water up to the mark.

Sol. IV (Ag, Ba, Co, Cr, Cu, Li, Ni, Tl, V, Mo, Pd, Pt, Sb) 1 mg/L: In a 50 mL volumetric flask were added: 0.5 mL 65% HNO<sub>3</sub>, 0.05 mL solution Ag 1000 mg / L, 0.05 mL solution Ba 1000 mg / L, 0.05

mL solution Co 1000 mg / L, 0.05 mL solution Cr 1000 mg / L, 0.05 mL solution Cu, 0.05 mL solution Li 1000 mg / L, 0.05 mL solution Ni 1000 mg / L, 0.05 mL solution Tl 1000 mg / L, 0.05 mL solution V 1000 mg / L, 0.05 mL solution Mo 1000 mg / L, 0.05 mL solution Pd 1000 mg / L, 0.05 mL solution Pt 1000 mg / L and 0.05 mL solution Sb 1000 mg / L; then, the obtained solution was brought to the mark with ultrapure water.

The four intermediate stock solutions (Sol. I – Sol. IV) were used for Cal.Std. Solutions (E1-E5) preparation. Thus, in each 25 mL volumetric flask were added 4 mL 65% HNO<sub>3</sub>, different volumes (mL) of Sol. I – Sol. IV (as registered in table S4) and ultrapure water up to the mark.

**Table S4.** Preparation of (E1-E5) calibration standard solutions

| Solution             | E1    | E2    | E3    | E4    | E5    |
|----------------------|-------|-------|-------|-------|-------|
| Volume (mL)          |       |       |       |       |       |
| 65% HNO <sub>3</sub> | 4.000 | 4.000 | 4.000 | 4.000 | 4.000 |
| Sol. I               | 0.025 | 0.125 | 0.250 | 0.375 | 0.625 |
| Sol. II              | 0.125 | 0.250 | 0.500 | 0.750 | 1.250 |
| Sol. III             | 0.025 | 0.125 | 0.250 | 0.375 | 0.500 |
| Sol. IV              | 0.025 | 0.125 | 0.250 | 1.250 | 2.500 |

**Figure S1** represents the calibration curves for 23 elements in ICP-MS analysis, where:

- Apparent concentration is each (E1-E5) calibration standard solution concentration (µg/L)
- Net intensity is the intensity of the signal received by the ICP detector, corresponding to the number of metal ions striking the detector every second (measured in count per second = CPS) from each (E1-E5) calibration standard solution
- Eqn.=linear equation
- Cor.Coeff.= coefficient of correlation (R<sup>2</sup>)
- BEC = background equivalent concentration (µg/L)
- DL=detection limit or limit of detection (LOD, µg/L)

([https://resources.perkinelmer.com/labsolutions/resources/docs/WHP Atomic Spectroscopy-Effects on Accuracy and Detection Limits 013559 01.pdf](https://resources.perkinelmer.com/labsolutions/resources/docs/WHP_Atomic_Spectroscopy-Effects_on_Accuracy_and_Detection_Limits_013559_01.pdf))

**Table S5.** Calibration curve range, R<sup>2</sup>, LOD, and LOQ (µg/L and µg/g) for each element

| Element   | m/z | Calibration curve range |           | R <sup>2</sup> | LOD   |       | LOQ estimated value |       |
|-----------|-----|-------------------------|-----------|----------------|-------|-------|---------------------|-------|
|           |     | µg/L                    | µg/g      |                | µg/L  | µg/g  | µg/L                | µg/g  |
| <b>Ag</b> | 107 | 1 – 100                 | 0.1 – 10  | 0.999997       | 0.058 | 0.006 | 1.000               | 0.100 |
| <b>Al</b> | 27  | 10 – 200                | 1 – 20    | 0.999872       | 2.863 | 0.286 | 10.00               | 1.000 |
| <b>As</b> | 75  | 1 – 25                  | 0.1 – 2.5 | 0.999861       | 0.345 | 0.035 | 1.000               | 0.100 |
| <b>Ba</b> | 138 | 1 – 100                 | 0.1 – 10  | 0.999992       | 0.067 | 0.007 | 1.000               | 0.100 |
| <b>Ca</b> | 43  | 50 – 500                | 5 – 50    | 0.996738       | 4.924 | 0.492 | 50.00               | 5.000 |
| <b>Cd</b> | 111 | 1 – 25                  | 0.1 – 2.5 | 0.999853       | 0.147 | 0.015 | 1.000               | 0.100 |
| <b>Co</b> | 59  | 1 – 100                 | 0.1 – 10  | 0.999982       | 0.060 | 0.006 | 1.000               | 0.100 |
| <b>Cr</b> | 52  | 1 – 100                 | 0.1 – 10  | 0.999976       | 0.090 | 0.009 | 1.000               | 0.100 |
| <b>Cu</b> | 63  | 1 – 100                 | 0.1 – 10  | 0.999995       | 0.057 | 0.006 | 1.000               | 0.100 |
| <b>Fe</b> | 57  | 50 – 500                | 5 – 50    | 0.998754       | 3.392 | 0.339 | 50.00               | 5.000 |
| <b>Li</b> | 7   | 1 – 100                 | 0.1 – 10  | 0.999932       | 0.198 | 0.020 | 1.000               | 0.100 |
| <b>Mg</b> | 24  | 50 – 500                | 5 – 50    | 0.999858       | 2.523 | 0.252 | 50.00               | 5.000 |
| <b>Mn</b> | 55  | 50 – 500                | 5 – 50    | 0.999801       | 1.911 | 0.191 | 50.00               | 5.000 |
| <b>Ni</b> | 60  | 1 – 100                 | 0.1 – 10  | 0.999986       | 0.096 | 0.010 | 1.000               | 0.100 |
| <b>Pb</b> | 208 | 1 – 25                  | 0.1 – 2.5 | 0.999646       | 0.053 | 0.005 | 1.000               | 0.100 |
| <b>Tl</b> | 205 | 1 – 100                 | 0.1 – 10  | 0.999985       | 0.025 | 0.002 | 1.000               | 0.100 |
| <b>V</b>  | 51  | 1 – 100                 | 0.1 – 10  | 0.999991       | 0.103 | 0.010 | 1.000               | 0.100 |
| <b>Zn</b> | 66  | 50 – 500                | 5 – 50    | 0.999791       | 1.996 | 0.200 | 50.00               | 5.000 |
| <b>Hg</b> | 202 | 1 – 25                  | 0.1 – 2.5 | 0.999751       | 0.198 | 0.020 | 1.000               | 0.100 |
| <b>Mo</b> | 98  | 1 – 100                 | 0.1 – 10  | 0.999995       | 0.097 | 0.010 | 1.000               | 0.100 |
| <b>Pd</b> | 106 | 1 – 100                 | 0.1 – 10  | 0.999998       | 0.064 | 0.006 | 1.000               | 0.100 |
| <b>Pt</b> | 195 | 1 – 100                 | 0.1 – 10  | 0.999998       | 0.027 | 0.003 | 1.000               | 0.100 |
| <b>Sb</b> | 121 | 1 – 100                 | 0.1 – 10  | 0.999984       | 0.138 | 0.014 | 1.000               | 0.100 |

m/z - mass-to-charge ratio; R<sup>2</sup> – correlation coefficient > 0.99; LOD – limit of detection, LOQ – Limit of quantification; Ag – silver, Al – aluminium, As – arsenic, Ba – barium, Ca – calcium, Cd – cadmium, Co – cobalt, Cr – chromium, Cu – copper, Fe – iron, Li – lithium, Mg – magnesium, Mn – manganese, Ni – nickel, Pb – lead, Tl – thallium, Zn – zinc, Hg – mercury, Mo – molybdenum, Pd – palladium, Pt – platinum, Sb – antimony
